# Supplementary material for: Conducting carbon quantum dots – a nascent nanomaterial
Source: Royal Society of Chemistry journal article supplement (doi:10.1039/c4ta05491a), 2014-11-10
Supplement: c4ta05491a1.pdf [file c4ta05491a1.pdf]

## ELECTRONIC SUPPLEMENTARY INFORMATION

### Conducting carbon quantum dots – A nascent nanomaterial <sup>†</sup>

Lopamudra Bhattacharjee, Ramasamy Manoharan, Kallol Mohanta and Rama Ranjan Bhattacharjee\*

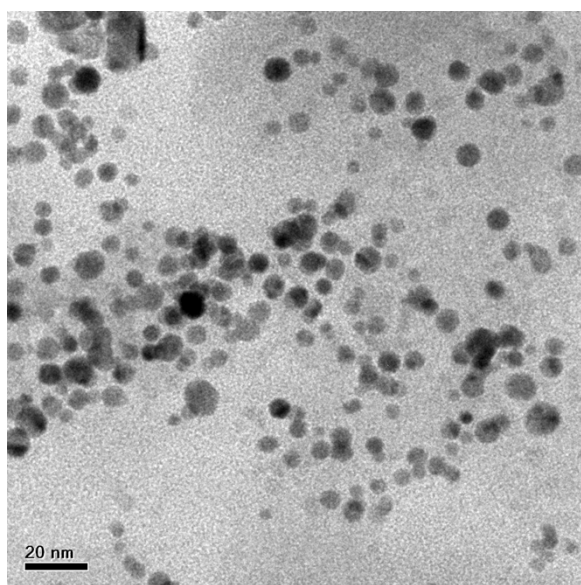

**Fig. SI1:** TEM image of PSS-CQDs dispersed in water and drop-casted on carbon coated copper grid.

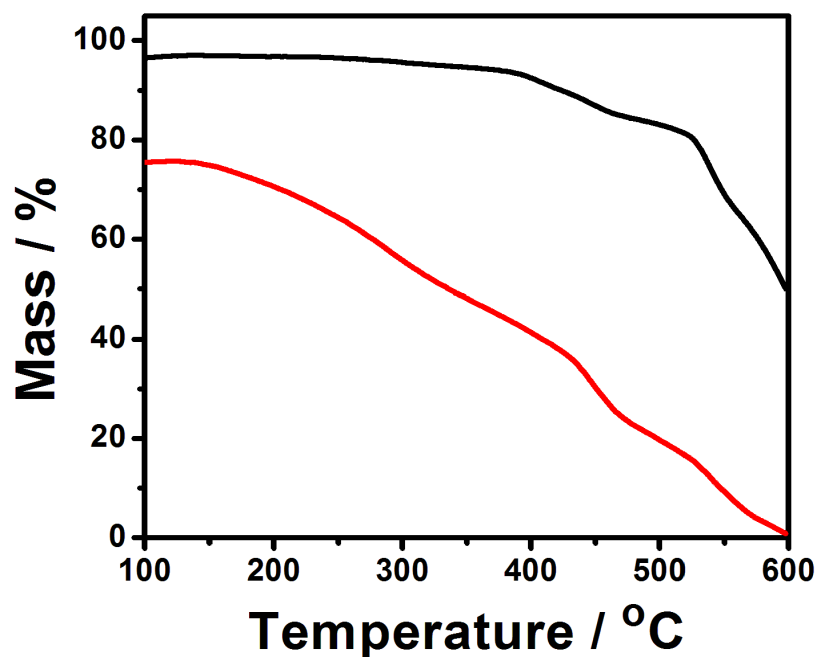

**Fig. SI2:** TGA data of pure PSS (black) and powder PSS-CQDs (red).

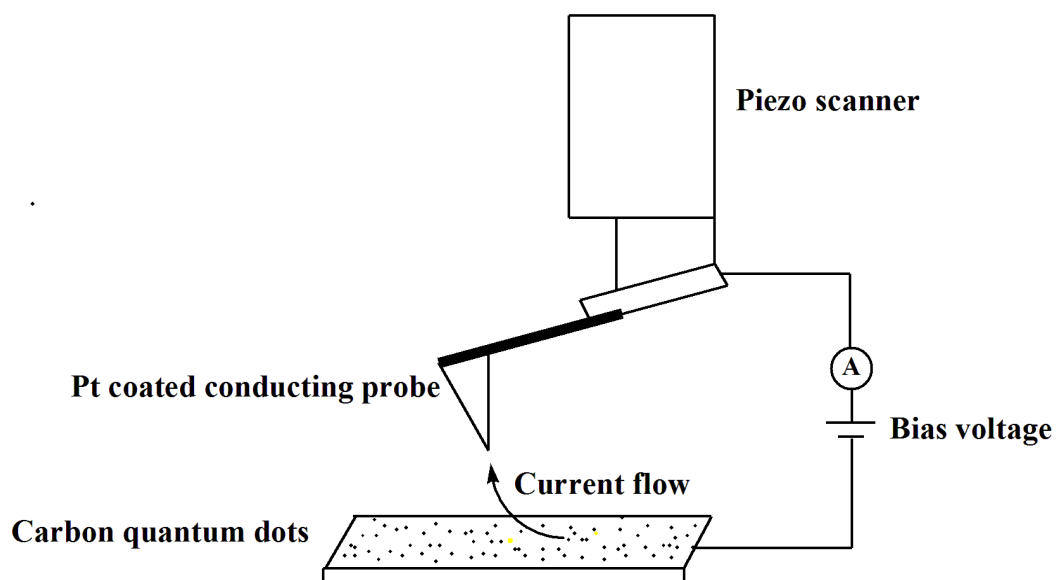

**Fig. SI3:** Schematic presentation of spreading resistance imaging technique.

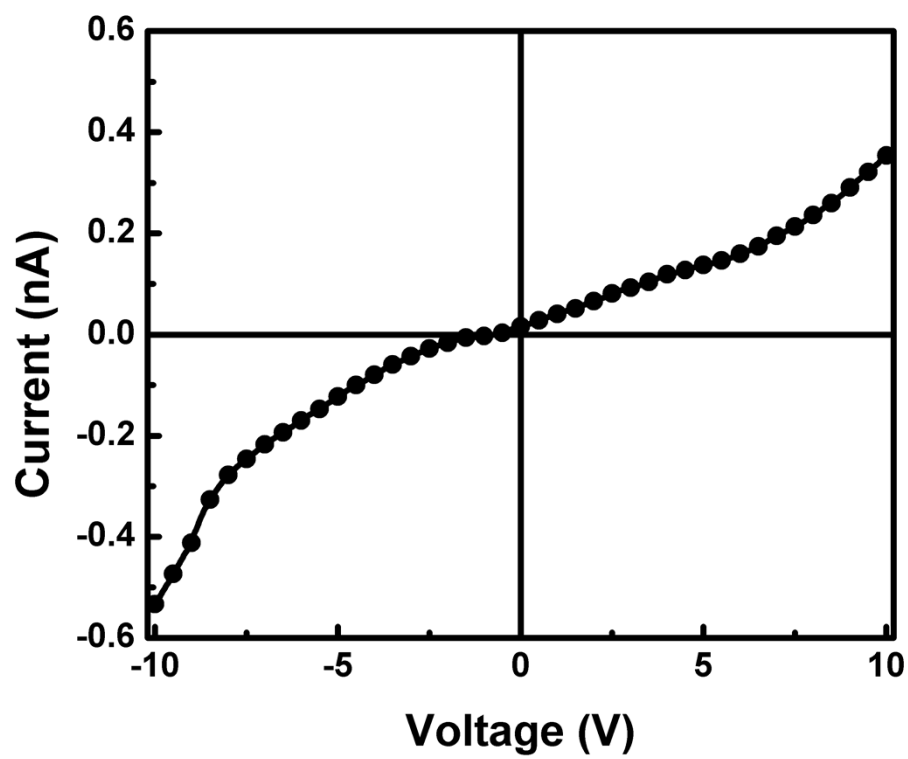

**Fig. SI4:** I-V characteristic of pellet of PSS-CQDs.
